# Supplementary material for: A highly stable metal–organic framework derived phosphorus doped carbon/Cu2O structure for efficient photocatalytic phenol degradation and hydrogen production
Source: Royal Society of Chemistry journal article supplement (doi:10.1039/c8ta12544a), 2019-01-01
Supplement: c8ta12544a1.pdf [file c8ta12544a1.pdf]

## Supporting Information

### **Highly stable metal-organic framework derived phosphorus doped carbon/Cu<sub>2</sub>O structure for efficient photocatalytic phenol degradation and hydrogen production**

Amare Aregahegn Dubale <sup>1,2</sup>, Ibrahim Nasser Ahmed <sup>1,3</sup>, Xia-Hui Chen <sup>4</sup>, Cheng Ding <sup>1</sup>, Gui-Hua Hou <sup>1</sup>, Rong-Feng Guan <sup>1</sup>, Xiangming Meng <sup>5</sup>, Xiu-Li Yang <sup>1,\*</sup> and Ming-Hua Xie <sup>1,\*</sup>

<sup>1</sup> Key Laboratory for Advanced Technology in Environmental Protection of Jiangsu Province, Yancheng Institute of Technology, Yancheng 224051, China

<sup>2</sup> Department of Chemistry, College of Natural and Computational Science, Energy and Environment Research Center, Dilla University, Dilla 419, Ethiopia

<sup>3</sup> Department of Industrial Chemistry, College of Applied Sciences, Addis Ababa Science and Technology University, Addis Ababa 16417, Ethiopia

<sup>4</sup> School of Electrical, Computer and Energy Engineering, Arizona State University, Tempe 85287, United States

<sup>5</sup> School of Chemistry and Chemical Engineering & Center for Atomic Engineering of Advanced Materials & Anhui Province Key Laboratory of Chemistry for Inorganic/Organic Hybrid Functionalized Materials, Anhui University, Hefei 230601, P.R. China

\*Corresponding authors Email: [minghxie@163.com](mailto:minghxie@163.com), [xlychem@126.com](mailto:xlychem@126.com)

The XRD patterns of the unmodified HKUST-1 and modified HKUST-1 MOF sample at 0.25 wt % triphenylphosphine involvement are shown in Fig. S1. The diffraction patterns of unmodified HKUST-1 are well indexed and the patterns were the same with the simulated XRD pattern. The XRD patterns of modified HKUST-1 were also similar with both the synthesized HKUST-1 and the simulated XRD pattern except a new peak emerged at  $2\theta = 36.4^\circ$  (selected peak) matching well with the diffraction patterns of  $\text{Cu}_2\text{O}$  (JCPDS card number 05-0667). This might be due to partial reduction of  $\text{Cu}^{2+}$  ions to  $\text{Cu}^+$  ions via TPP. This suggests that the triphenylphosphine incorporation process was successful, and the ligands, triphenylphosphine and trimesic acid, can be involved in coordination reaction with the  $\text{Cu}^{2+}$  cation.

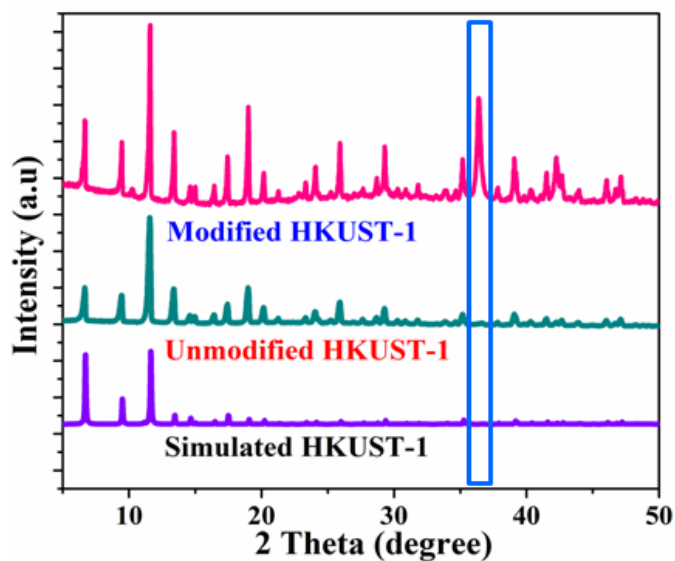

**Fig. S1** XRD patterns of modified and unmodified HKUST-1.

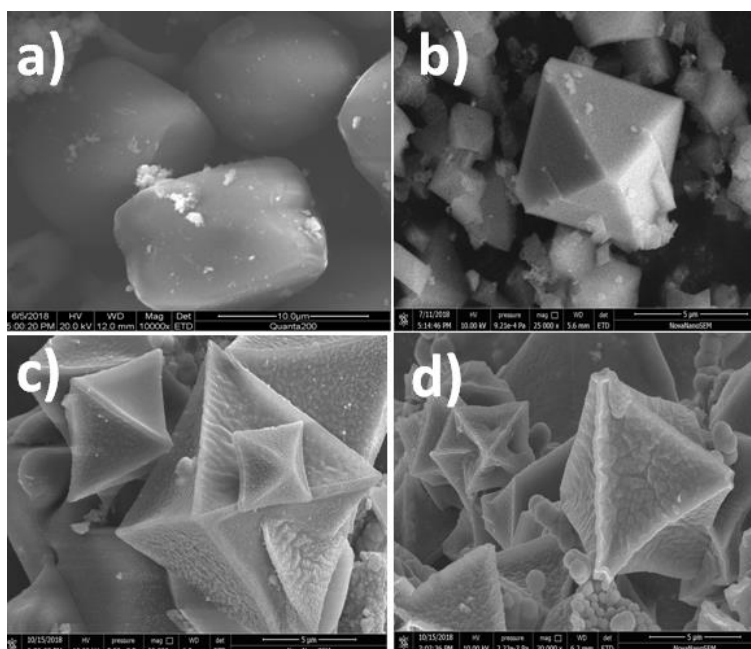

**Fig. S2** Scanning electron microscopy (SEM) images of the unmodified HKUST-1 (a) and modified HKUST-1 in presence of 0.25 (b), 0.50 (c) and 0.75 weight ratio of triphenylphosphine.

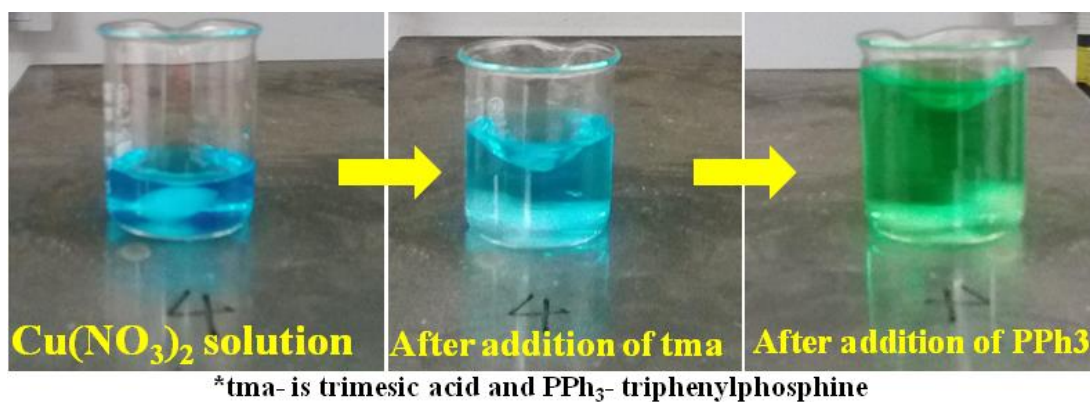

**Fig. S3** Digital photographs of solutions during preparation of modified HKUST-1

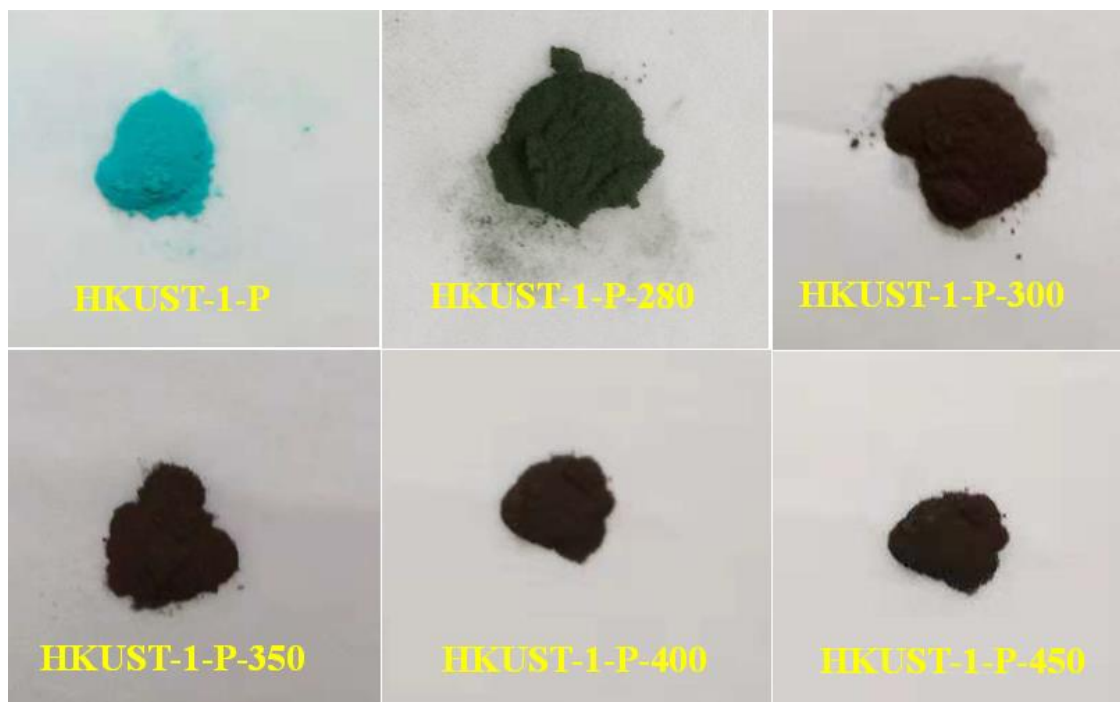

**Fig. S4** Digital photographs of different samples

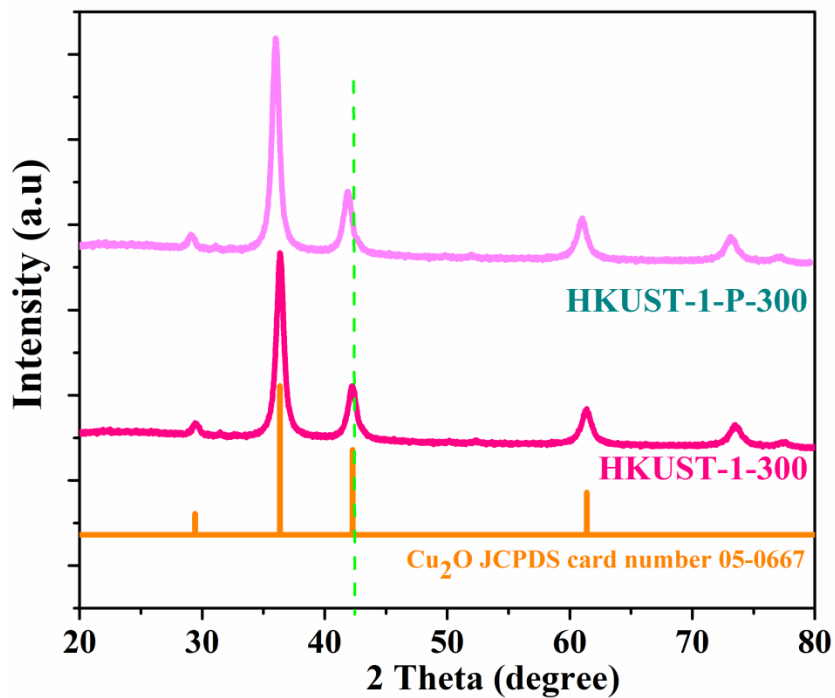

**Fig. S5** XRD patterns of HKUST-1-P-300 and HKUST-1-300

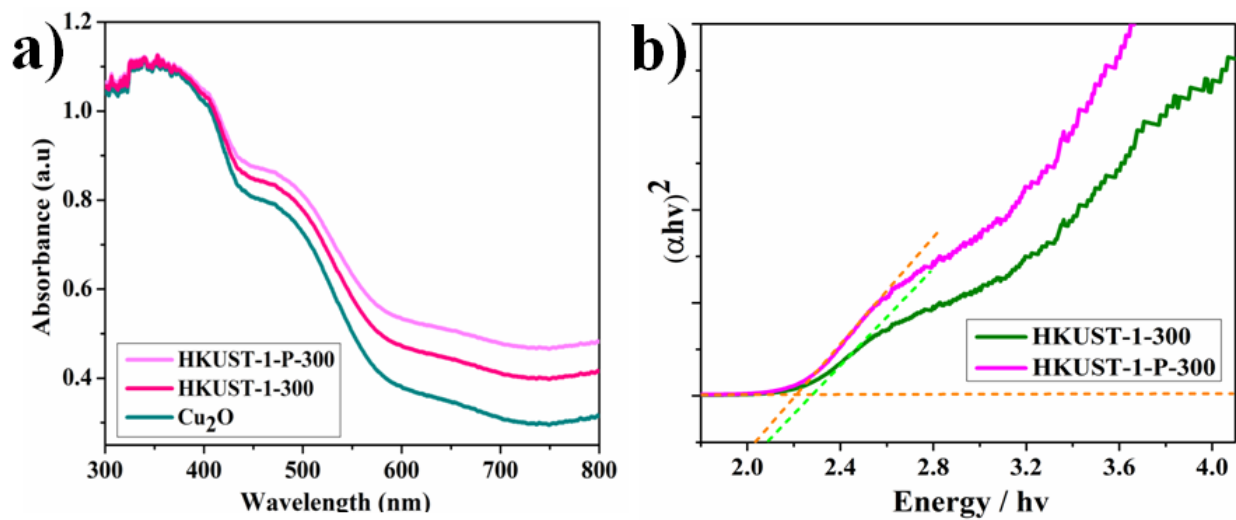

**Fig. S6** (a) UV-Vis diffuse absorption spectra of HKUST-1-P-300, HKUST-1-300 and Cu<sub>2</sub>O nanoparticles and (b) Tauc plots of HKUST-1-P-300 and HKUST-1-300 samples for band gap estimation.

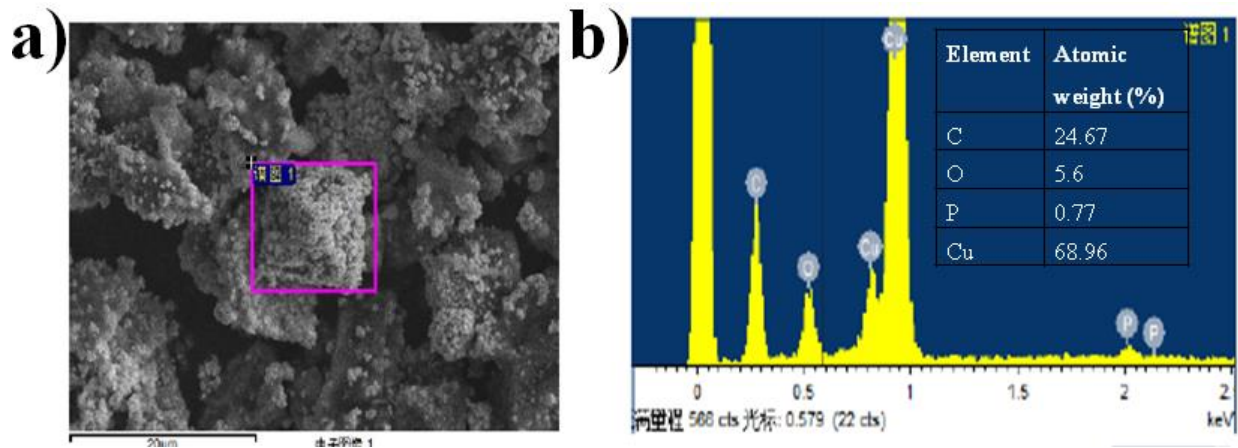

**Fig. S7** SEM images (a) and Typical EDX analysis (b) acquired from the HKUST-1-P-300

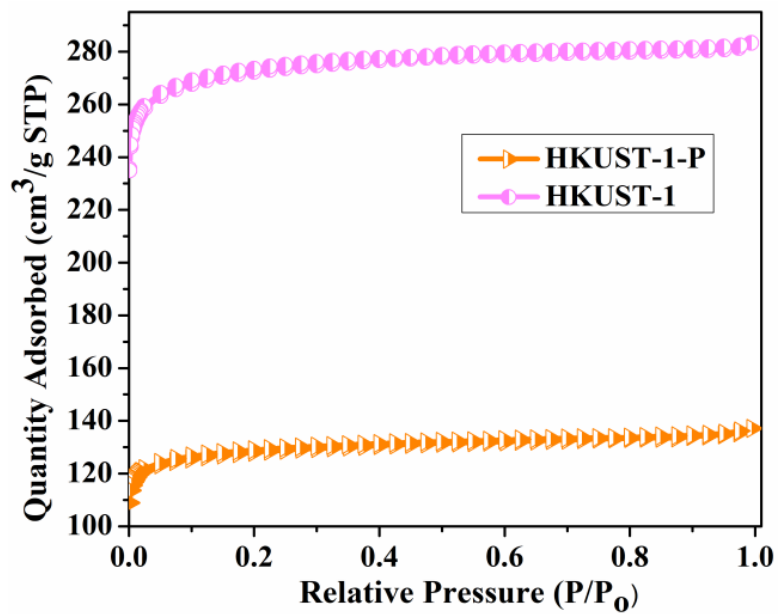

**Fig. S8** Nitrogen adsorption and desorption isotherms of HKUST-1 and HKUST-1-P

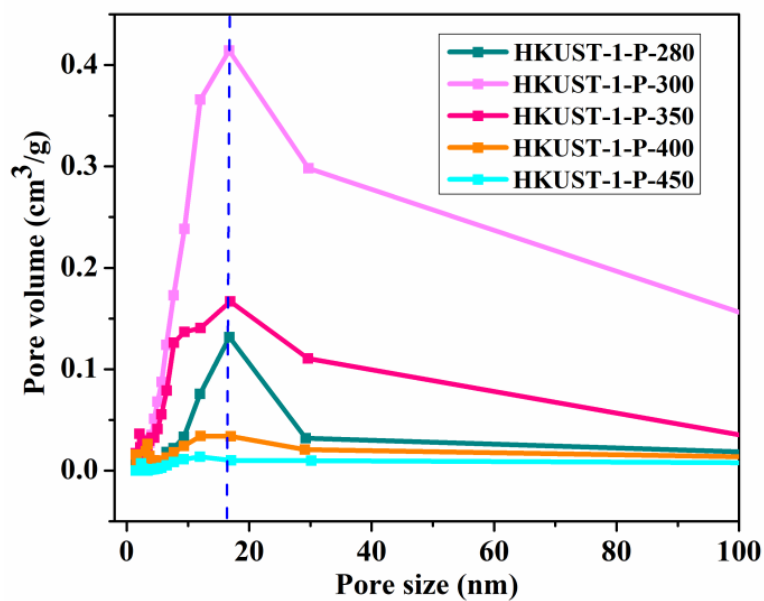

**Fig. S9** BJH pore size distribution of different prepared samples

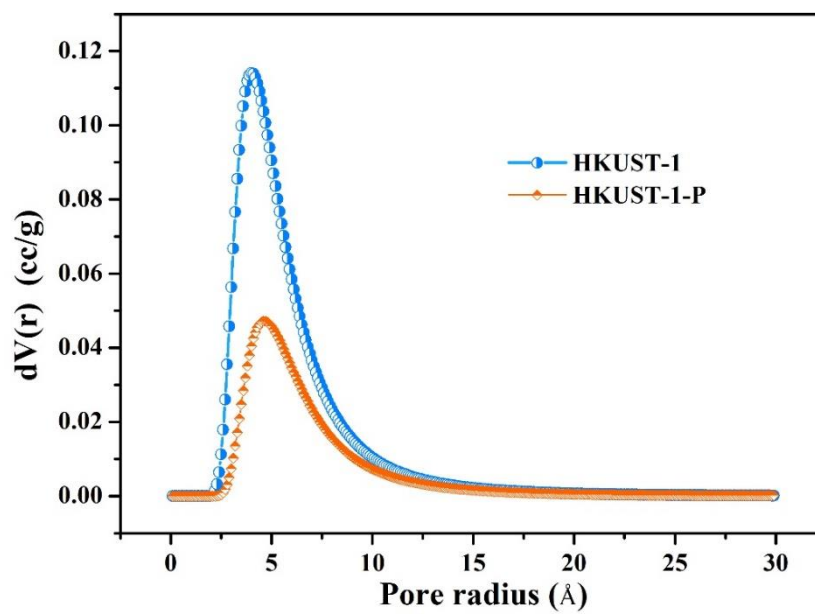

**Fig. S10** D-A pore size distribution of MOF precursors.

**Table S1** BET information of the prepared samples

| Sample        | $S_{\text{BET}}$ ( $\text{m}^2 \text{g}^{-1}$ ) | Pore size (nm) | Pore volume ( $\text{cm}^3 \text{g}^{-1}$ ) |
|---------------|-------------------------------------------------|----------------|---------------------------------------------|
| HKUST-1       | 1103.2                                          | 0.41           | 0.438                                       |
| HKUST-1-P     | 517.9                                           | 0.46           | 0.212                                       |
| HKUST-1-P-280 | 11.31                                           | 16.8           | 0.059                                       |
| HKUST-1-P-300 | 219.2                                           | 12.0           | 0.356                                       |
| HKUST-1-P-350 | 28.15                                           | 2.1            | 0.134                                       |
| HKUST-1-P-400 | 10.72                                           | 1.5            | 0.034                                       |
| HKUST-1-P-450 | 2.73                                            | 2.4            | 0.014                                       |

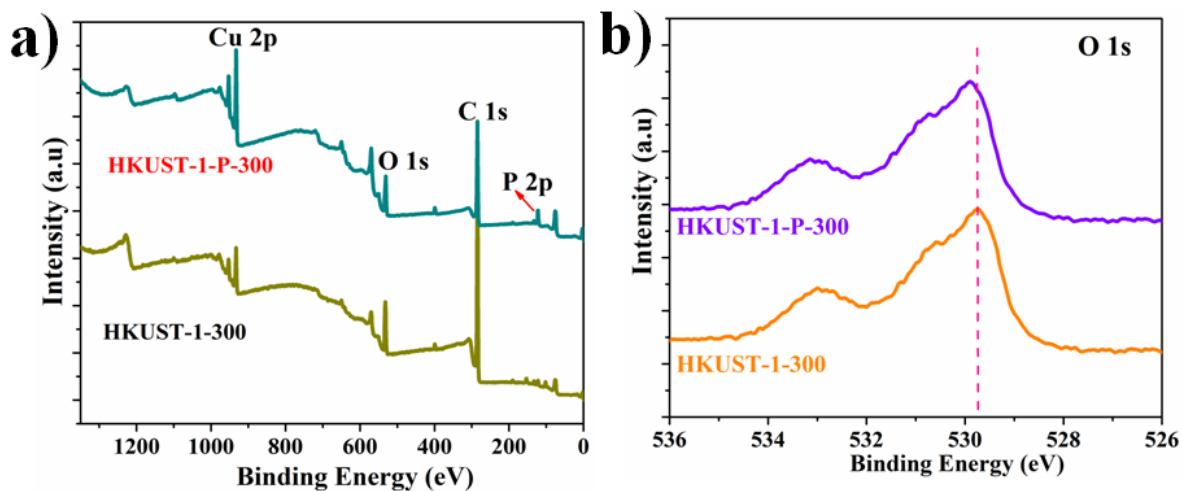

**Fig. S11** (a) XPS survey spectra of for HKUST-1-300 and HKUST-1-P-300 and (b) High resolution XPS spectra of O 1s for HKUST-1-300 and HKUST-1-P-300 samples.



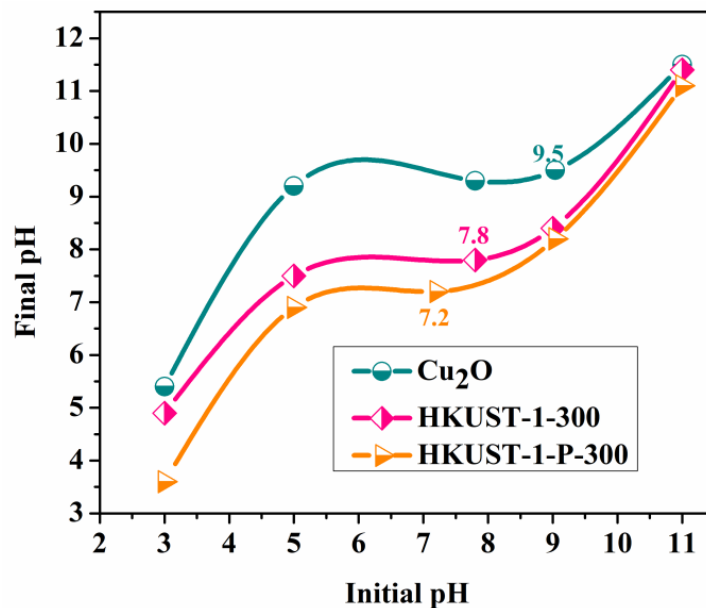

**Fig. S12**  $pH_{pzc}$  analysis of HKUST-1-P-300, HKUST-1-300 and  $Cu_2O$ .

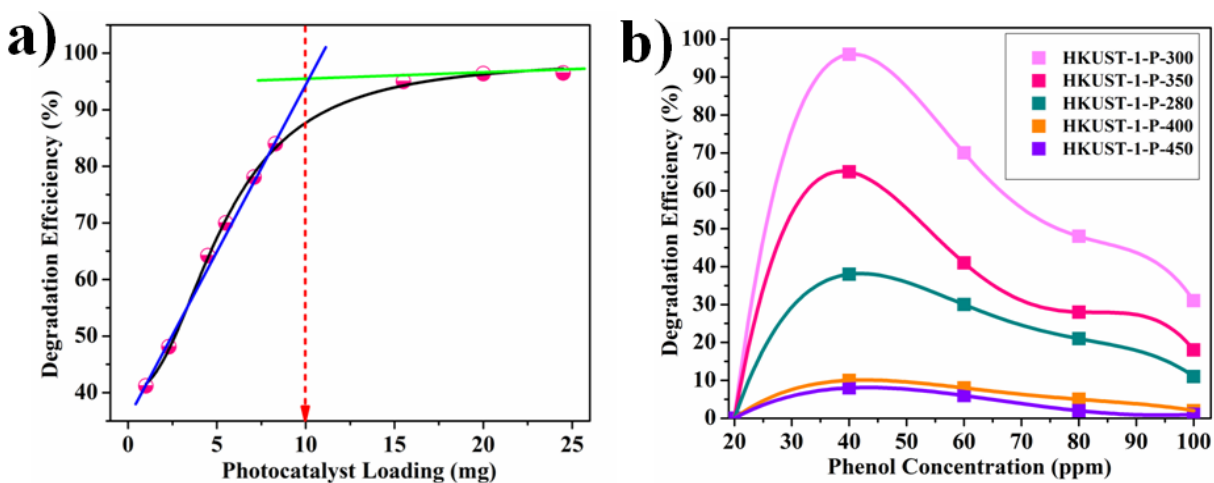

**Fig. S13** (a) Degradation efficiency of phenol vs. photocatalyst loading and (b) effect of phenol initial concentration in presence of HKUST-1-P-280, HKUST-1-P-300, HKUST-1-P-350, HKUST-1-P-400 and HKUST-1-P-450 photocatalyst (10 mg photocatalyst dose and at pH 6.8) under visible light irradiation for 2 h.

**Table S2** Effect of phenol initial concentration in presence of HKUST-1-P-280, HKUST-1-P-300, HKUST-1-P-350, HKUST-1-P-400 and HKUST-1-P-450 photocatalyst (10 mg photocatalyst dose and at pH 6.8 under visible light irradiation for 2 h.

| Initial phenol concentration (ppm) | Degradation efficiency (%) of phenol by different photocatalyst |               |               |               |               |
|------------------------------------|-----------------------------------------------------------------|---------------|---------------|---------------|---------------|
|                                    | HKUST-1-P-280                                                   | HKUST-1-P-300 | HKUST-1-P-350 | HKUST-1-P-400 | HKUST-1-P-450 |
| 20                                 | -                                                               | -             | -             | -             | -             |
| 40                                 | 38                                                              | 96            | 65            | 10            | 8             |
| 60                                 | 30                                                              | 70            | 41            | 8             | 6             |
| 80                                 | 21                                                              | 48            | 28            | 5             | 2             |
| 100                                | 11                                                              | 31            | 18            | 2             | 1             |

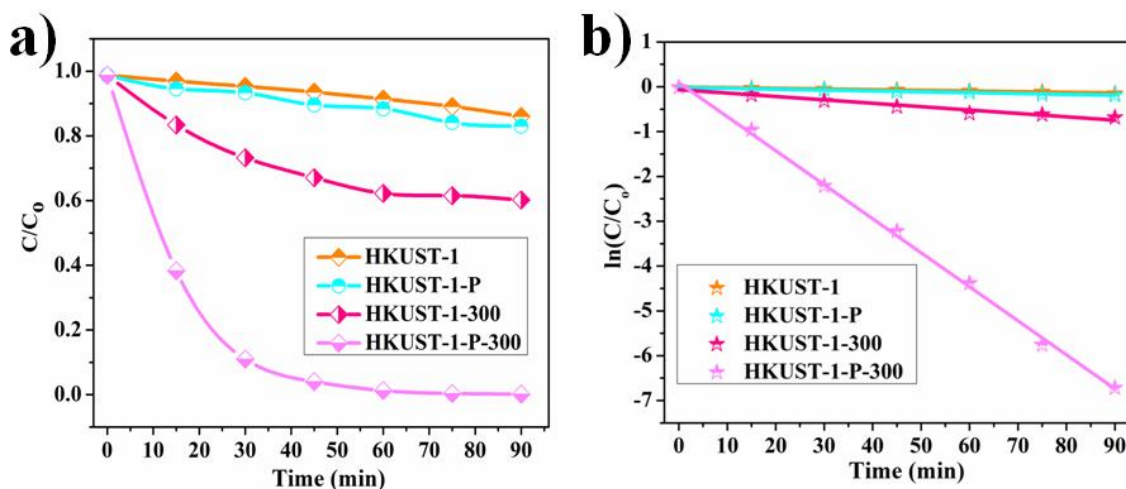

**Fig. S14** (a) Degradation efficiency of phenol and (b) corresponding pseudo-first-order kinetic curves of modified and unmodified sample (10 mg catalyst dosage, 40 ppm of phenol solution and at pH 7) under visible light irradiation for 1.5 h.

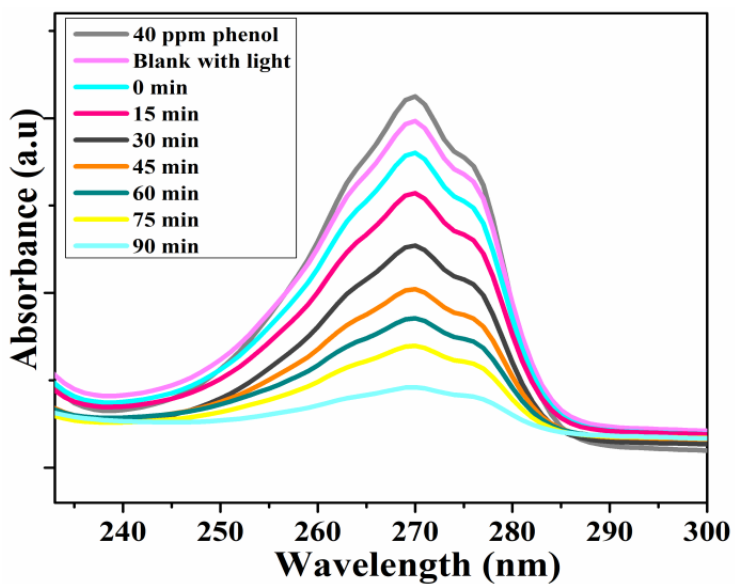

**Fig. S15** UV-Vis spectral changes of the degradation of phenol using HKUST-1-P-300

**Table S3** Summary of the phenol photo degradation catalyzed by different catalyst.

| Sample        | Apparent rate constant ( $\text{min}^{-1}$ ) | Degradation efficiency (%) | Moles of phenol degraded | TON (60 min) | TOF ( $\text{min}^{-1}$ ) |
|---------------|----------------------------------------------|----------------------------|--------------------------|--------------|---------------------------|
| HKUST-1-P     | 0.0018                                       | 11.6                       | $4.93 \times 10^{-3}$    | 1389         | 23.2                      |
| HKUST-1-P-280 | 0.0074                                       | 49.6                       | $2.11 \times 10^{-2}$    | 5944         | 99.1                      |
| HKUST-1-P-300 | 0.075                                        | 99.4                       | $4.25 \times 10^{-2}$    | 11887        | 198.1                     |
| HKUST-1-P-350 | 0.013                                        | 72.1                       | $3.06 \times 10^{-2}$    | 8620         | 143.7                     |
| HKUST-1-P-400 | 0.0019                                       | 18.9                       | $8.03 \times 10^{-3}$    | 2262         | 37.7                      |
| HKUST-1-P-450 | 0.0014                                       | 13.9                       | $5.91 \times 10^{-3}$    | 1665         | 27.8                      |

The turnover number and the corresponding turnover frequency for phenol degradation were calculated using equation (1) and (2) as follows:

$$TON = \frac{\text{the moles of phenol degraded}}{\text{the moles of phosphorus loaded to the photocatalyst}} \quad \text{equation (1)}$$

$$TOF = \frac{TON}{\text{time (min)}} \quad \text{equation (2)}$$

For instance, the corresponding TON and TOF of phenol degradation using HKUST-P-300 was calculated to be:

$$TON = \frac{4.25 \times 10^{-2}}{0.01 \times 1.1\% \times \frac{1}{30.974}} = 11887$$

$$TOF = \frac{11887}{60 \text{ min}} = 198.1 \text{ min}^{-1}$$

**Table S4** Photodegradation of phenol using different photocatalyst

| Photocatalyst                                    | Initial phenol concentration (ppm) | Time (min) | pH  | Irradiation     | Degradation (%) | Ref. |
|--------------------------------------------------|------------------------------------|------------|-----|-----------------|-----------------|------|
| n-TiO <sub>2</sub> (77 nm)                       | 37.6                               | 180        | 7   | direct sunlight | 87.3            | 1    |
| n-TiO <sub>2</sub> (77 nm)                       | 37.6                               | 180        | 7   | direct sunlight | 95.2            | 1    |
| Eosin Y-TiO <sub>2</sub> /Pt                     | 40                                 | 90         | 7   | visible light   | 93              | 2    |
| ZnO nanorods                                     | 10                                 | 150        | -   | visible light   | 50              | 3    |
| TMU-5(Cd 30%)                                    | 25                                 | 120        | 6.8 | visible light   | 78              | 4    |
| V-doped α-MnO <sub>2</sub>                       | 100                                | 720        | 6   | UV light        | 76.8            | 5    |
| Fe[HO <sub>3</sub> PCH(OH)COO] 2H <sub>2</sub> O | 50                                 | 80         | 7.9 | UV light        | 90              | 6    |
| CuO-CO <sub>3</sub> O <sub>4</sub>               | ~20                                | 30         | -   | UV light        | ~90             | 7    |
| α-Fe <sub>2</sub> O <sub>3</sub> /RGO            | 10                                 | 120        | -   | visible light   | 67              | 8    |

|                                                                                 |           |           |          |                      |             |                   |
|---------------------------------------------------------------------------------|-----------|-----------|----------|----------------------|-------------|-------------------|
| BiOCl-TiO <sub>2</sub>                                                          | 50        | 360       | -        | visible light        | 40          | 9                 |
| BiOI-loaded ZnO                                                                 | 25        | 120       |          | UV light             | 99.9        | 10                |
| Ag <sub>3</sub> PO <sub>4</sub> -BiOCl <sub>0.75</sub> Br <sub>0.25</sub> (1:5) | 25        | 75        | -        | visible light        | 97.9        | 11                |
| N-doped TiO <sub>2</sub>                                                        | 50        | 540       |          | visible light        | 99.2        | 12                |
| M-ZnO                                                                           | 25        | 200       |          | visible light        | 61.8        | 13                |
| <b>HKUST-1-P-300 (P-doped carbon/Cu<sub>2</sub>O)</b>                           | <b>40</b> | <b>60</b> | <b>7</b> | <b>visible light</b> | <b>99.4</b> | <b>This study</b> |

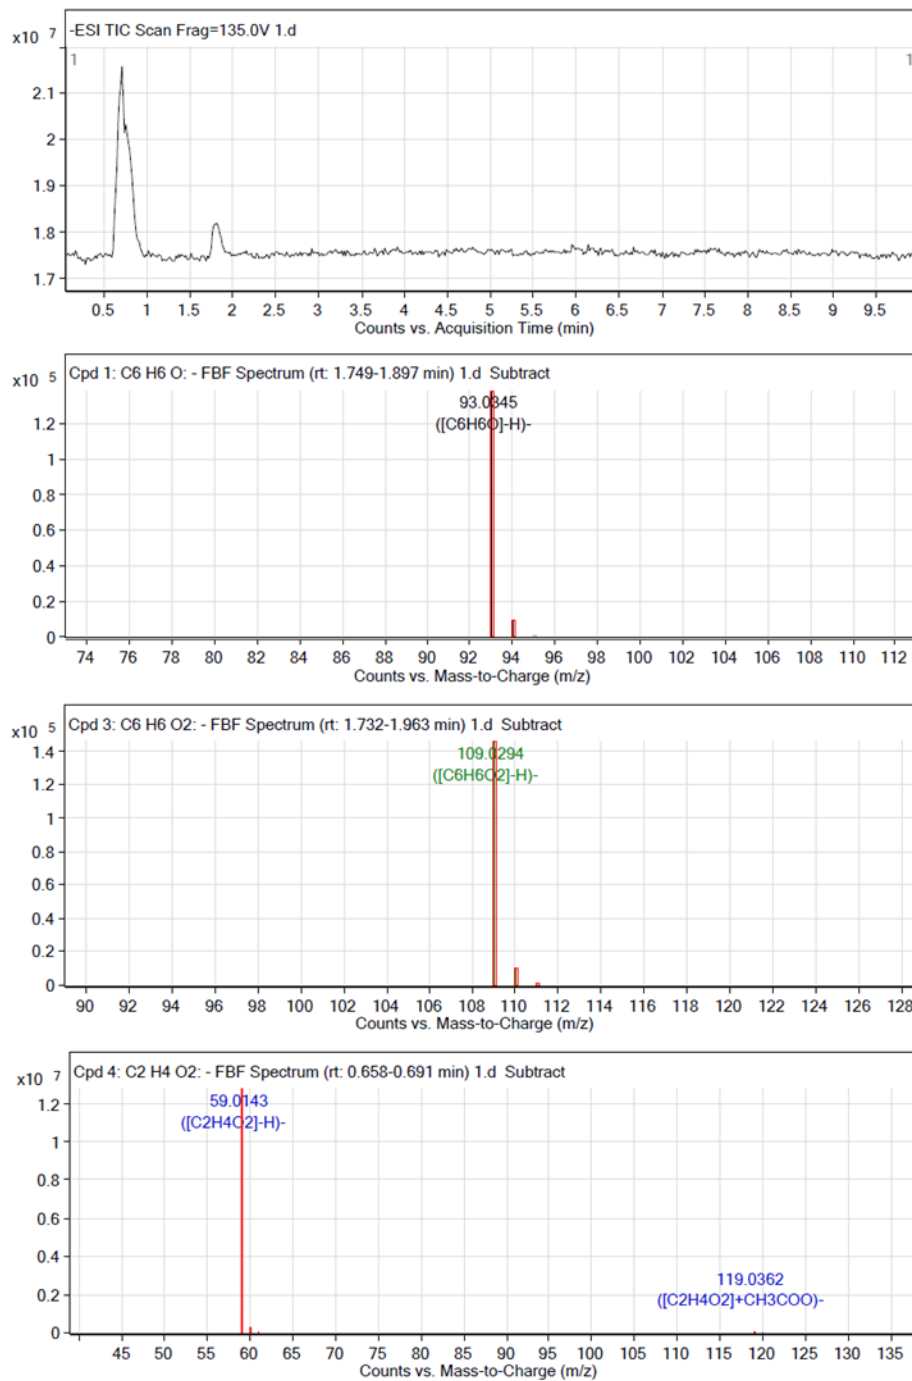

**Fig. S16** HPLC-MS spectrum and MS spectra of phenol photo degradation catalyzed by HKUST-1-P-300: irradiated for 15 minutes.

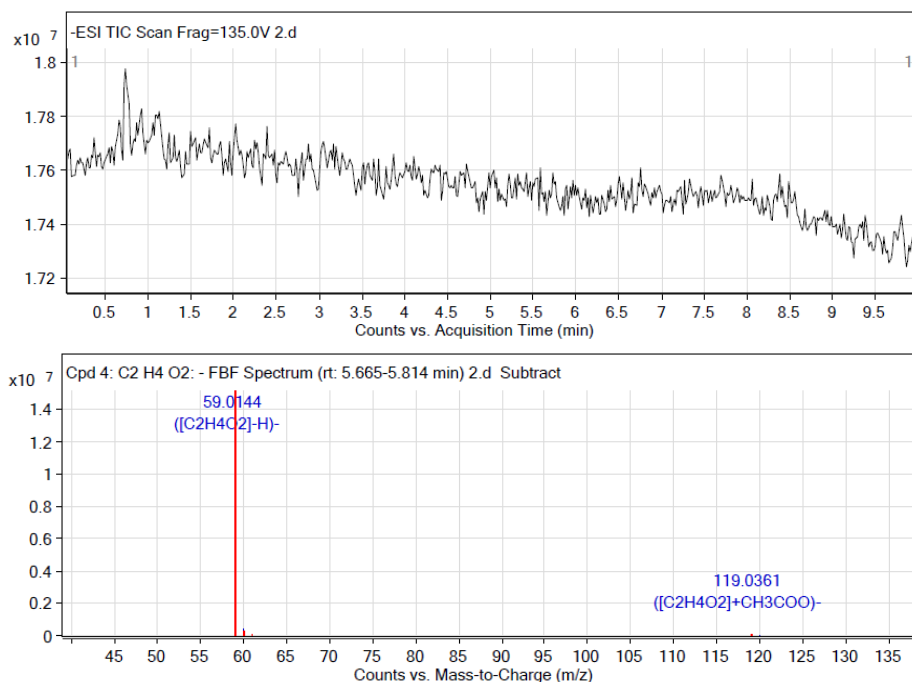

**Fig. S17** HPLC-MS spectrum and MS spectrum of phenol photo degradation catalyzed by HKUST-1-P-300: irradiated for 30 minutes.

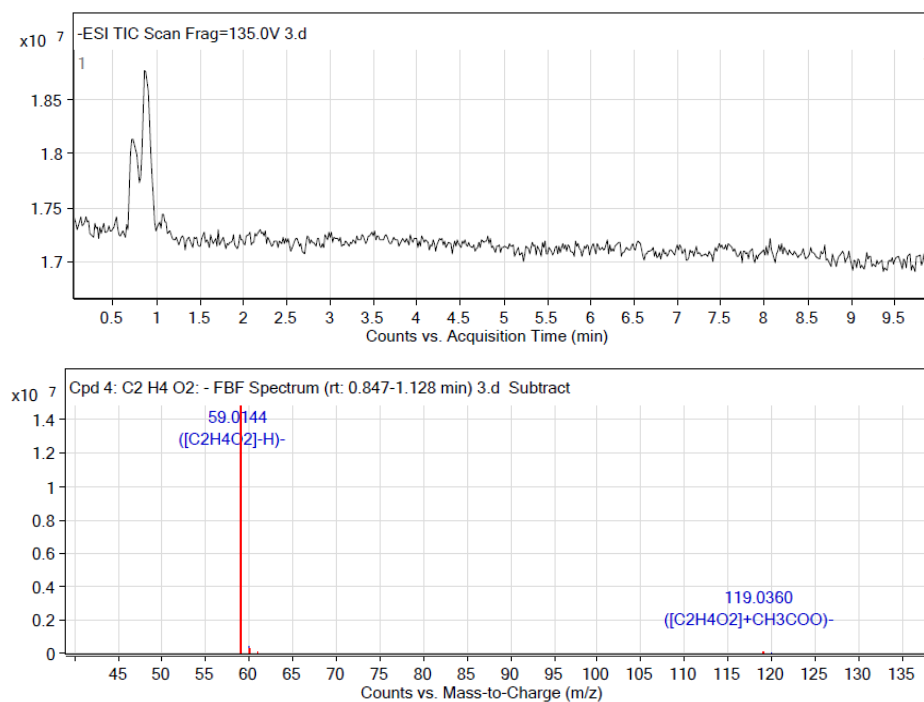

**Fig. S18** HPLC-MS spectrum and MS spectrum of phenol photo degradation catalyzed by HKUST-1-P-300: irradiated for 45 minutes

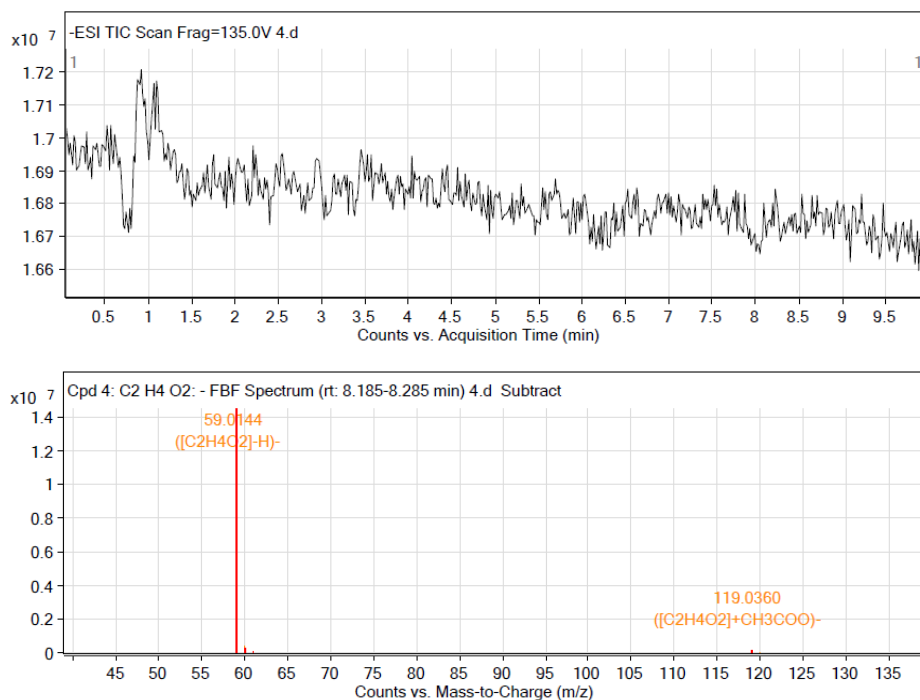

**Fig. S19** HPLC-MS spectrum and MS spectrum of phenol photo degradation catalyzed by HKUST-1-P-300: irradiated for 60 minutes.

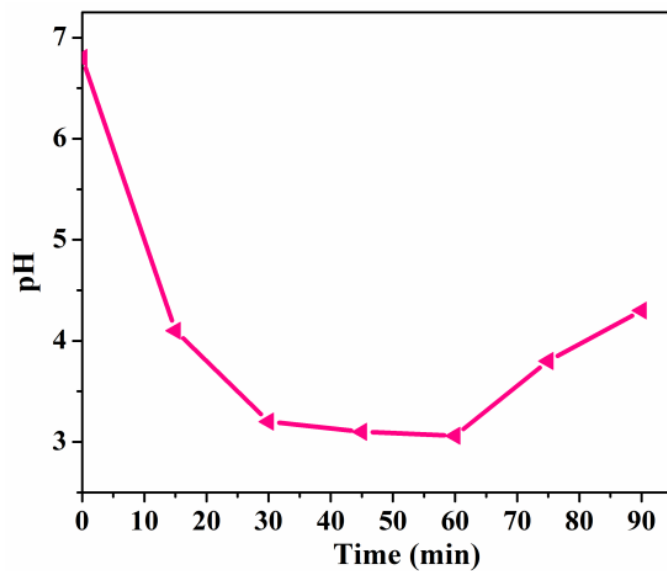

**Fig. S20** pH changes in the phenol solution vs. photocatalysis time using HKUST-1-P-300.



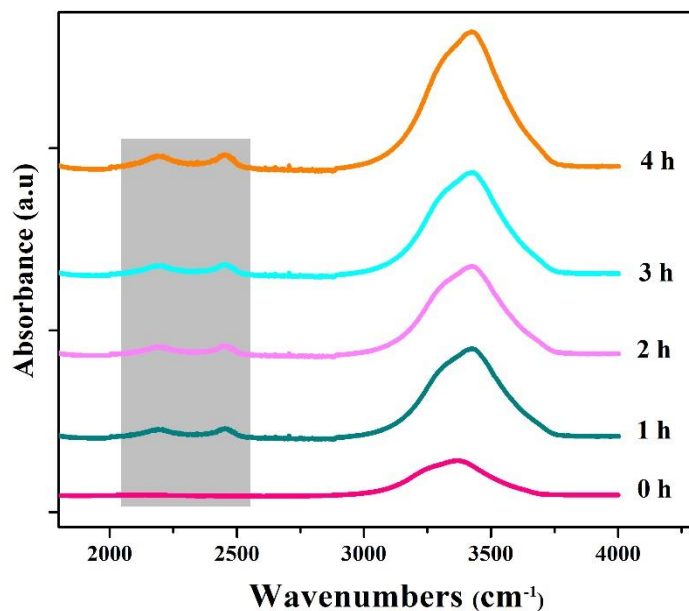

**Fig. S21** FTIR spectra for evolution of CO<sub>2</sub> as an indication of complete mineralization of phenol molecules. Reaction time was extended to 4h to give a clear observation of the characteristic absorption peak (gray zone) of CO<sub>2</sub>.

**Table S5** Theoretical mass balance between MeOH and thus generated CO<sub>2</sub> & H<sub>2</sub> during photochemical H<sub>2</sub> production catalyzed by HKUST-1-P-300. UV absorption at 190 nm was used to calculate the MeOH concentration value (g mL<sup>-1</sup>).

| <b>CH<sub>3</sub>OH + H<sub>2</sub>O → CO<sub>2</sub> + 3H<sub>2</sub></b> |                        |                                   |                                  |
|----------------------------------------------------------------------------|------------------------|-----------------------------------|----------------------------------|
| Time (h)                                                                   | Methanol concentration | Theoretical CO <sub>2</sub> conc. | Theoretical H <sub>2</sub> conc. |
| 0                                                                          | 0.155                  | 0                                 | 0                                |
| 1                                                                          | 0.140                  | 0.0148                            | 0.0443                           |
| 2                                                                          | 0.131                  | 0.0238                            | 0.0714                           |
| 3                                                                          | 0.130                  | 0.0249                            | 0.0749                           |
| 4                                                                          | 0.127                  | 0.0281                            | 0.0842                           |

**Table S6** Change of gas phase CO<sub>2</sub> & H<sub>2</sub> concentration in the reactor during photochemical H<sub>2</sub> production catalyzed by HKUST-1-P-300. GC-TCD technology was used to determine the data.

| Time (h) | CO <sub>2</sub> composition (%) | H <sub>2</sub> composition (%) |
|----------|---------------------------------|--------------------------------|
| 0        | 0                               | 0                              |
| 1        | 0.28                            | 99.72                          |
| 2        | 0.48                            | 99.52                          |
| 3        | 0.52                            | 99.48                          |
| 4        | 0.60                            | 99.4                           |

**Table S7** Comparison of hydrogen production via photochemical water splitting using bare or modified Cu<sub>2</sub>O based photocatalyst.

| Photocatalyst                        | Co-catalyst      | Sacrificial agent | H <sub>2</sub> evolution rate (μmol h <sup>-1</sup> ) | Ref.             |
|--------------------------------------|------------------|-------------------|-------------------------------------------------------|------------------|
| Cu <sub>2</sub> O/ MoS <sub>2</sub>  | MoS <sub>2</sub> | Methanol          | 45.0                                                  | 14               |
| <sup>a</sup> rGO/Cu <sub>2</sub> O   | Pt               | Methanol          | 2.645                                                 | 15               |
| Zn-Doped Cu <sub>2</sub> O           | Pt               | Glucose           | 38.17                                                 | 16               |
| Cu <sub>2</sub> O/rGO                | -                | TEOA              | 45.3                                                  | 17               |
| <sup>b</sup> NGQDs-Cu <sub>2</sub> O | Pt               | Methyl alcohol    | 2.26                                                  | 18               |
| Cu <sub>2</sub> O                    | -                | -                 | 2                                                     | 19               |
| Cu-Cu <sub>2</sub> O-graphene        | Pt               | Methanol          | 1.62                                                  | 20               |
| <b>HKUST-1-P-300</b>                 | <b>-</b>         | <b>Methanol</b>   | <b>151</b>                                            | <b>This work</b> |

<sup>a</sup>rGO- reduced graphene oxide; <sup>b</sup>NGQDs- nitrogen doped graphene quantum dots;

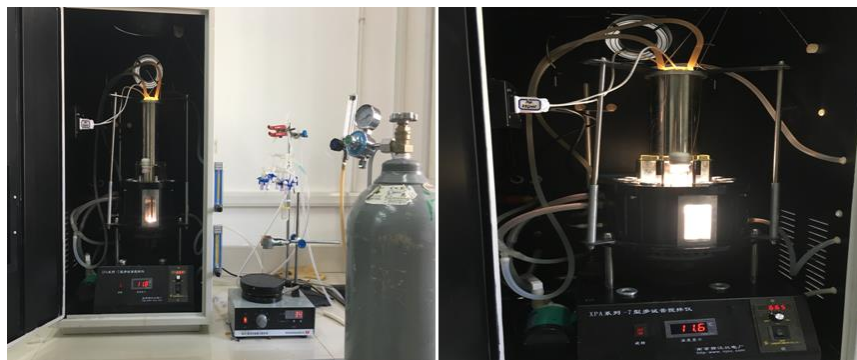

**Fig. S22** Digital photo of the reaction mixture during irradiation

The external quantum efficiency (EQE) was measured under the same photocatalytic reaction condition as described before except that irradiation of light from Xenon lamp was carried out at different wavelength (425, 440, 480, 520 and 600 nm) by using a monochromator (monochromator: omno151). The light intensity was obtained with an optical power meter (FZ-400, HSX-F300 Beijing), and the number of incident photons and quantum efficiency were obtained by equation (3) and equation (4), respectively. The amounts of H<sub>2</sub> molecules generated in 3 h using HKUST-1-P-300 are used for calculation of external quantum efficiency.

$$N = \frac{E\lambda}{hc} \quad \text{equation (3)}$$

$$EQE = \frac{2 \times \text{the number of evolved } H_2 \text{ molecules}}{\text{the number of incident photons}} \times 100\% \quad \text{equation (4)}$$

For instance, the corresponding number of incident photons (N) and external quantum efficiency (EQE) at 425 nm was calculated to be  $4.85 \times 10^{19}$  and 48.6%, respectively. That is:

$$N = \frac{E\lambda}{hc} = \frac{2.1 \times 10^{-3} \times 3 \times 3600 \times 425 \times 10^{-9}}{6.626 \times 10^{-34} \times 3 \times 10^8} = 4.85 \times 10^{19}$$

$$EQE = \frac{2 \times 6.02 \times 10^{23} \times 19.57 \times 10^{-6}}{4.85 \times 10^{19}} = 48.6\%$$

**Table S8** The calculated External Quantum Efficiency (EQE) at different wavelength

| Sample        | Wavelength (nm) | H <sub>2</sub> evolved (μmol) | Light intensity (mW) | N <sub>0</sub> of incident photon (N) | EQE (%) |
|---------------|-----------------|-------------------------------|----------------------|---------------------------------------|---------|
| HKUST-1-P-300 | λ=425           | 19.57                         | 2.1                  | 4.85×10 <sup>19</sup>                 | 48.6    |
|               | λ=440           | 15.32                         | 2.7                  | 6.45×10 <sup>19</sup>                 | 28.2    |
|               | λ=480           | 9.28                          | 5.1                  | 1.33×10 <sup>20</sup>                 | 8.4     |
|               | λ=520           | 2.23                          | 5.5                  | 1.49×10 <sup>20</sup>                 | 1.8     |
|               | λ=600           | 0.216                         | 4.1                  | 1.30×10 <sup>20</sup>                 | 0.2     |
| HKUST-1-P-280 | λ=425           | 1.25                          | 2.1                  | 4.85×10 <sup>19</sup>                 | 3.1     |
| HKUST-1-P-350 | λ=425           | 3.30                          | 2.1                  | 4.85×10 <sup>19</sup>                 | 8.2     |
| HKUST-1-P-400 | λ=425           | 0.483                         | 2.1                  | 4.85×10 <sup>19</sup>                 | 1.2     |
| HKUST-1-P-450 | λ=425           | 0.384                         | 2.1                  | 4.85×10 <sup>19</sup>                 | 0.84    |
| HKUST-1-P     | λ=425           | 0.0004                        | 2.1                  | 4.85×10 <sup>19</sup>                 | 0.001   |

The turnover number and the corresponding turnover frequency for hydrogen evolution were calculated by using equation (5) below and equation (4) above, respectively. The amount of evolved H<sub>2</sub> using HKUST-1-P-300 photocatalyst is ~1208 μmol in 8 h.

$$TON = \frac{\text{the moles of evolved } H_2}{\text{the moles of phosphorus loaded to the photocatalyst}} \quad \text{equation (5)}$$

$$TON = \frac{1208 \times 10^{-6}}{0.01 \times 1.1\% \times \frac{1}{30.974}} = 340.2$$

$$TOF = \frac{340.2}{8 \text{ h}} = 42.5 \text{ h}^{-1}$$

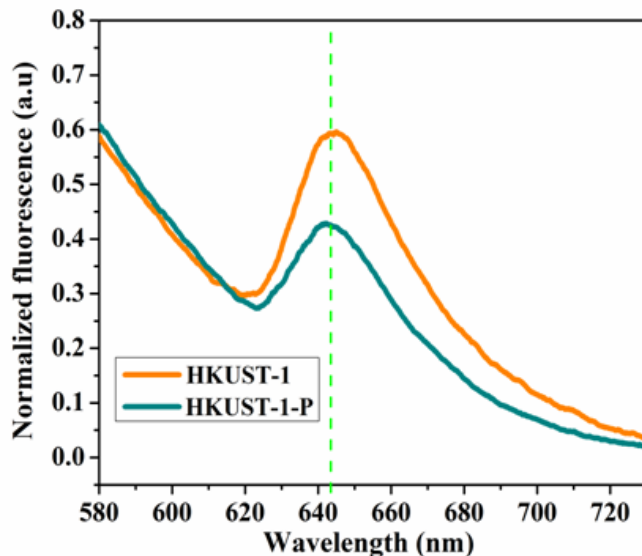

**Fig. S23** Photoluminescence spectra of HKUST-1 and unmodified HKUST-1-P

### Theoretical studies of P-doping

All calculations were performed using the Perdew-Burke-Ernzerhof (GGA-PBE)<sup>21</sup> exchange-correlation functional implemented in the plane-wave based Vienna ab initio simulation package (VASP)<sup>22-24</sup>, the projector augmented wave (PAW) method<sup>25, 26</sup> with a frozen-core approximation was used to describe the ion-electron interactions. A cutoff energy of 400 eV and the conjugate-gradient algorithm were used in the calculations. Brillouin-zone integrations were done with Monkhorst Pack<sup>27</sup> grids using a generalized Gaussian smearing width of 0.1 eV.<sup>28</sup> Density of states (DOS) was calculated with  $(5 \times 5 \times 1)$   $k$ -points grids for Cu<sub>2</sub>O and P-doped Cu<sub>2</sub>O. The substrate is modeled with four-layer slab of  $4 \times 4$  surface unit, subjected to three-dimensional periodic boundary conditions. The slabs were separated by vacuums of 15 Å. The bottom two atomic layers were fixed at theoretical equilibrium bulk positions of Cu and O, while all the other atoms were allowed to relax. The band gap values calculated from DFT results are usually much smaller than that of measured values, however it is still could be used for mutual comparison to get the regularity of materials because they were studied under the same standard.<sup>29</sup>

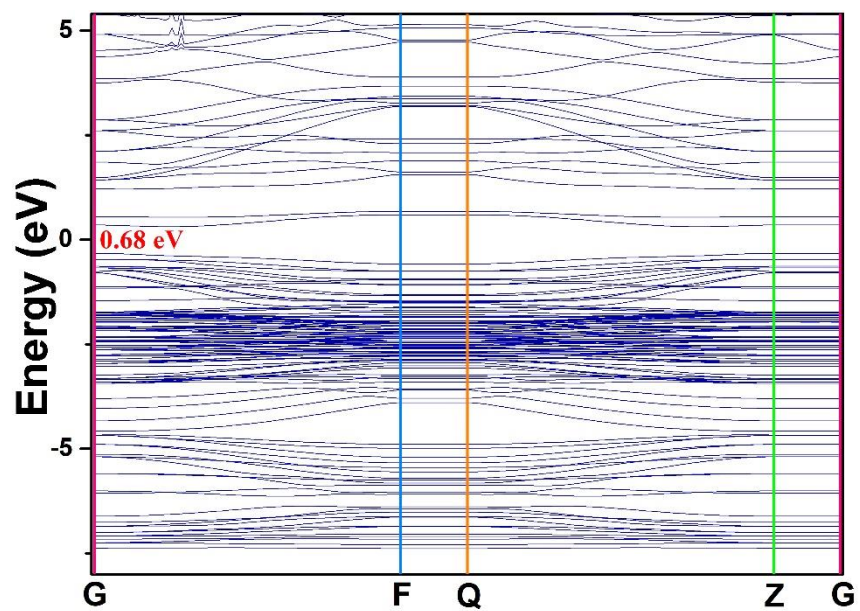

**Fig. S24** Electronic band structure of Cu<sub>2</sub>O (1, 1, 1).

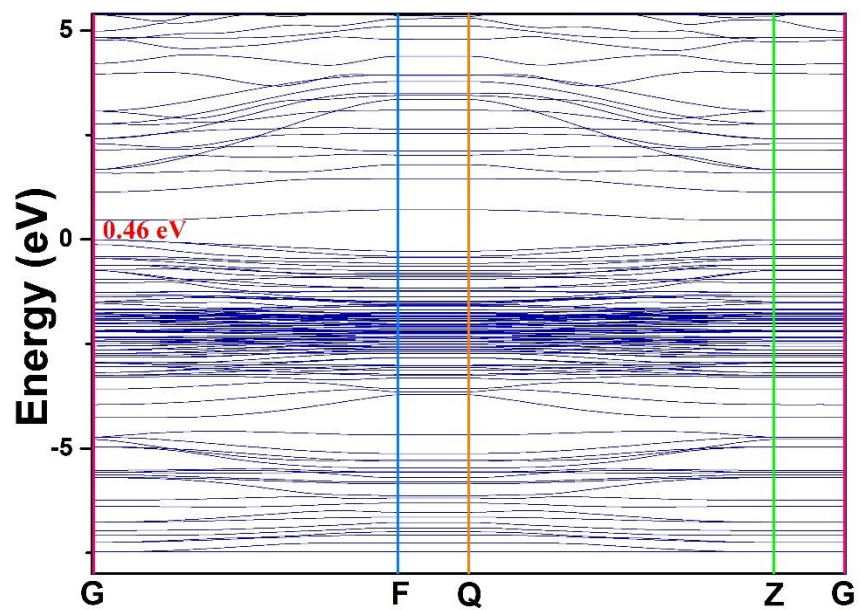

**Fig. S25** Electronic band structure of P-Cu<sub>2</sub>O (1, 1, 1).

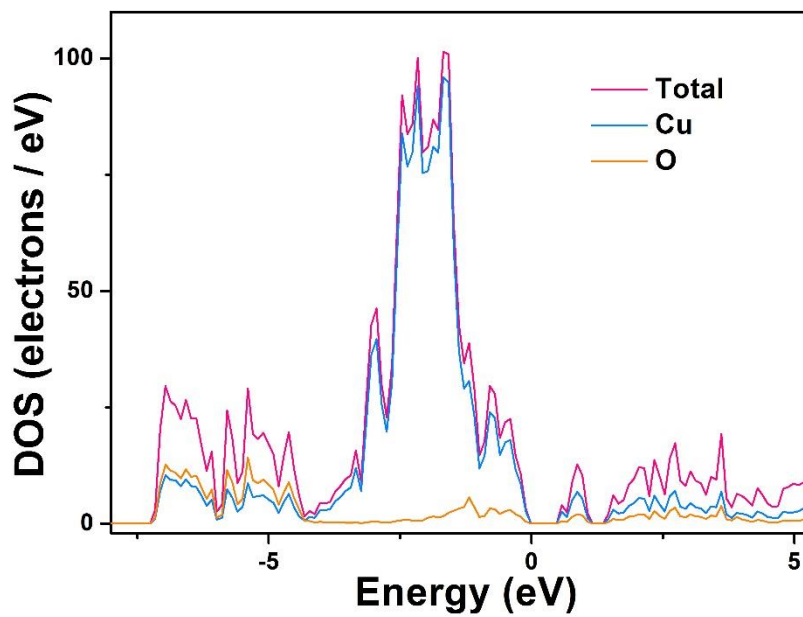

Fig. S26 PDOS and TDOS of  $\text{Cu}_2\text{O}$  (1, 1, 1).

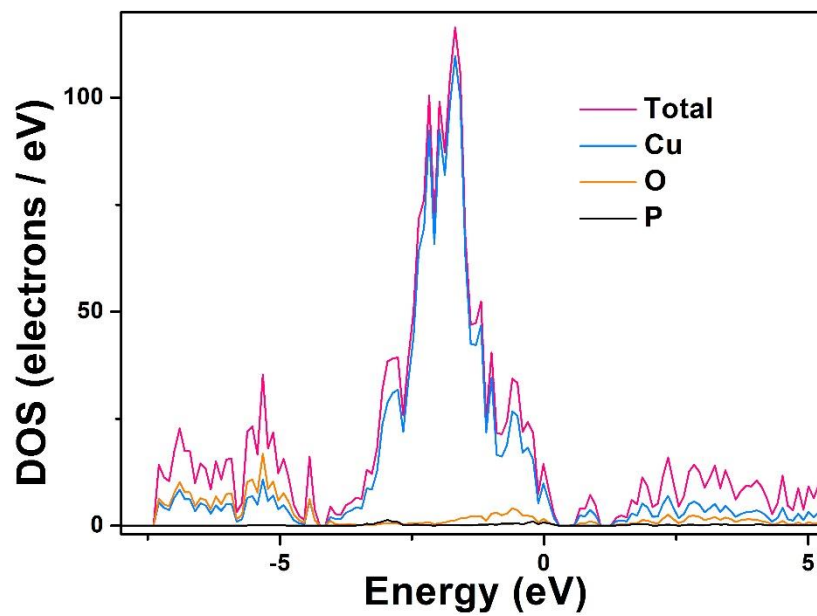

Fig. S27 PDOS and TDOS of P- $\text{Cu}_2\text{O}$  (1, 1, 1).

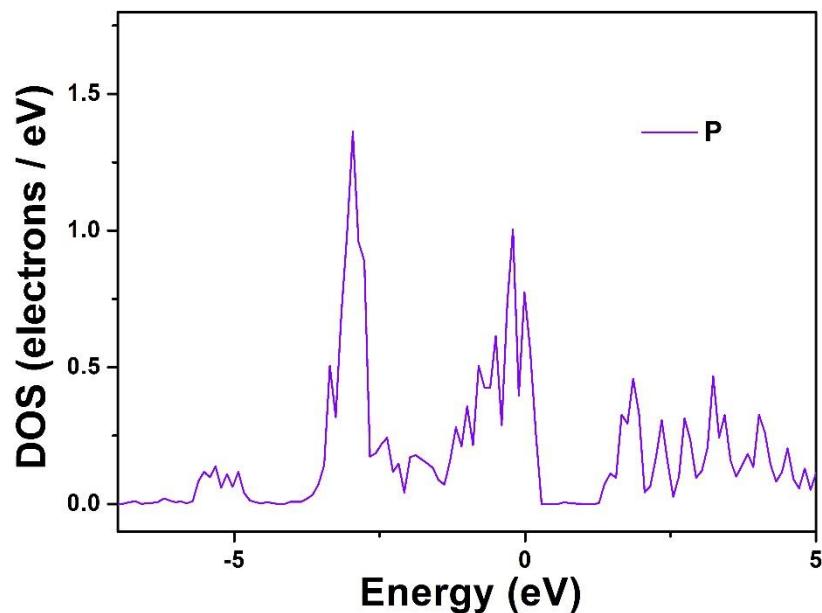

**Fig. S28** PDOS of phosphorus in P-Cu<sub>2</sub>O (1, 1, 1).

#### References:

1. A. M. Asiri, M. S. Al-Amoudi, T. A. Al-Talhi and A. D. Al-Talhi, Photodegradation of Rhodamine 6G and phenol red by nanosized TiO<sub>2</sub> under solar irradiation, *J. Saudi Chem. Soc.*, 2011, **15**, 121–128.
2. P. Chowdhury, J. Moreira, H. Goma and A. K. Ray, Visible-solar-light-driven photocatalytic degradation of phenol with dye-sensitized TiO<sub>2</sub>: Parametric and kinetic study, *Ind. Eng. Chem. Res.*, 2012, **51**, 4523–4532.
3. J. Al-Sabahi, T. Bora, M. Al-Abri and J. Dutta, Controlled defects of zinc oxide nanorods for efficient visible light photocatalytic degradation of phenol, *Materials.*, 2016, **9**, 238: doi:10.3390/ma9040238.
4. M. Y. Masoomi, M. Bagheri, A. Morsali and P. C. Junk, High photodegradation efficiency of phenol by mixed-metal–organic frameworks, *Inorg. Chem. Front.*, 2016, **3**, 944–951
5. S. Chen, S. Zhang, T. Wang, Z. Lei, M. Zhu, X. Dai, F. Liu, J. Li and H. Yin, Structure and properties of vanadium-doped  $\alpha$ -MnO<sub>2</sub> and enhanced Pb<sup>2+</sup> adsorption phenol/photocatalytic degradation, *Mater. Chem. Phys.*, 2018, **208**, 258–267.



6. M. Bazaga-Garcia, A. Cabeza, P. Olivera-Pastor, I. Santacruz, R. M. P. Colodrero and M. A. G. Aranda, Photodegradation of phenol over a hybrid organo-inorganic material: Iron(II) hydroxyphosphonoacetate, *J. Phys. Chem. C*, 2012, **116**, 14526–14533.
7. W. Shi and N. Chopra, Controlled fabrication of photoactive copper oxide–cobalt oxide nanowire heterostructures for efficient phenol photodegradation, *ACS Appl. Mater. Interfaces*, 2012, **4**, 5590–5607.
8. G. K. Pradhan, D. K. Padhi and K. M. Parida, Fabrication of  $\alpha$ -Fe<sub>2</sub>O<sub>3</sub> nanorod/RGO composite: a novel hybrid photocatalyst for phenol degradation, *ACS Appl. Mater. Interfaces*, 2013, **5**, 9101–9110.
9. D. Sánchez-Rodríguez, M. G. Méndez Medrano, H. Remita and V. Escobar-Barríos, Photocatalytic properties of BiOCl–TiO<sub>2</sub> composites for phenol photodegradation, *J. Environ. Chem. Eng.*, 2018, **6**, 1601–1612.
10. J. Jiang, H. Wang, X. Chen, S. Li, T. Xie, D. Wang and Y. Lin, Enhanced photocatalytic degradation of phenol and photogenerated charges transfer property over BiOI-loaded ZnO composites, *J. Colloid Interface Sci.*, 2017, **494**, 130–138.
11. Y. L. Qi, G. Han and X. C. Song, Enhanced photocatalytic degradation of phenol over Ag<sub>3</sub>PO<sub>4</sub>–BiOCl<sub>1-x</sub>Br<sub>x</sub> composites, *Mater. Res. Bull.*, 2018, **102**, 16–23.
12. M. A. Mohamed, W.N.W. Salleh, J. Jaafar, A.F. Ismail and N. A. M. Nor, Photodegradation of phenol by N-Doped TiO<sub>2</sub> anatase/rutile nanorods assembled microsphere under UV and visible light irradiation, *Mater. Chem. Phys.*, 2015, **162**, 113–123
13. Z.-J Wu, W. Huang, K.-K Cui, Z.-F Gao and P. Wang, Sustainable synthesis of metals-doped ZnO nanoparticles from zinc-bearing dust for photodegradation of phenol, *J. Hazard. Mater.*, 2014, **278**, 91–99
14. Y.-F. Zhao, Z.-Y. Yang, Y.-X. Zhang, L. Jing, X. Guo, Z. Ke, P. Hu, G. Wang, Y.-M. Yan and K.-N. Sun, Cu<sub>2</sub>O decorated with cocatalyst MoS<sub>2</sub> for solar hydrogen production with enhanced efficiency under visible light, *J. Phys. Chem. C.*, 2014, **118**, 14238–14245.
15. P. D. Tran, S. K. Batabyal, S. S. Pramana, J. Barber, L. H. Wong and S. C. Loo, A cuprous oxide-reduced graphene oxide (Cu<sub>2</sub>O-rGO) composite photocatalyst for hydrogen generation: employing rGO as an electron acceptor to enhance the photocatalytic activity and stability of Cu<sub>2</sub>O, *Nanoscale*, 2012, **4**, 3875–3878.

16. L. Zhang, D. Jing, L. Guo, and X. Yao, In Situ photochemical synthesis of Zn-Doped Cu<sub>2</sub>O hollow microcubes for high efficient photocatalytic H<sub>2</sub> production, *ACS Sustainable Chem., Eng.* 2014, **2**, 1446–1452.
17. H. Xu, X. Li, S.-Z Kang, L. Qin, G. Li and J. Mu, Noble metal-free cuprous oxide/reduced graphene oxide for enhanced photocatalytic hydrogen evolution from water reduction, *Int. J. Hydrogen Energy.*, 2014, **39**, 11578–11582.
18. Y. Wu, M. Yan, J. Gao, P. Lv, X. Liu, C. Li and Y. Yan, Fabrication of nitrogen-doped graphene quantum dots-Cu<sub>2</sub>O catalysts for enhanced photocatalytic hydrogen evolution, *Nano*, 2018, **8**, 1850099: doi: 10.1142/S1793292018500996.
19. M. Hara, T. Kondo, M. Komoda, S. Ikeda, K. Shinohara, A. Tanaka, J. N. Kondo and K. Domen, Cu<sub>2</sub>O as a photocatalyst for overall water splitting under visible light irradiation, *Chem. Commun.*, 1998, **0**, 357–358
20. D. Zhang, D. Wei, Z. Cui, S. Wang, S. Yang, M. Cao and C. Hu, Improving water splitting performance of Cu<sub>2</sub>O through a synergistic “two-way transfer” process of Cu and graphene, *Phys. Chem. Chem. Phys.*, 2014, **16**, 25531–25536.
21. P. Perdew, J. A. Chevary, S. H. Vosko, K. A. Jackson, M. R. Pederson, D. J. Singh and C. Fiolhais, *Phys. Rev. B:Condens. Matter Mater. Phys.*, 1992, **46**, 6671–6687.
22. G. Kresse and J. Furthmüller, *Phys. Rev. B*, 1996, **54**, 11169.
23. G. Kresse and J. Furthmüller, *Comput. Mater. Sci.*, 1996, **6**, 15.
24. G. Kresse and J. Hafner, *Phys. Rev. B*, 1993, **47**, 558.
25. J. P. Perdew, J. A. Chevary, S. H. Vosko, K. A. Jackson, M. R. Pederson, D. J. Singh, and C. Fiolhais, *Phys. Rev. B*, 1992, **46**, 6671.
26. J. A. White and D. M. Bird, *Phys. Rev. B*, 1994, **50**, 4954.
27. H. J. Monkhorst and J. D. Pack, *Phys. Rev. B*, 1976, **13**, 5188.
28. M. Methfessel and A. T. Paxton, *Phys. Rev. B*, 1989, **40**, 3616.
29. W. Yu, D. Xu and T. Peng, *J. Mater. Chem. A*, 2015, **3**, 19936
